# Supplementary material for: Cross-Over between Discrete and Continuous Protein Structure Space: Insights into Automatic Classification and Networks of Protein Structures
Source: PubMed Central journal article supplement (PMC2654728; doi:10.1371/journal.pcbi.1000331), 2009-03-27
Supplement: pcbi.1000331.s001.pdf [file pcbi.1000331.s001.pdf]

## Supporting Figure 1

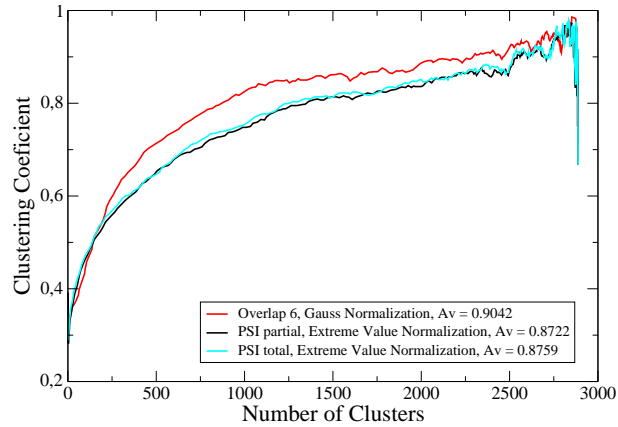

Clustering coefficient for three different similarity measures. We build networks by joining domains with  $S_{ij} > S_0$  and plot their clustering coefficient versus the number of clusters obtained with single linkage clustering of the network. The smaller  $S_0$ , the fewer clusters there are and the smaller is the clustering coefficient.
