# Supplementary material for: Cross-Over between Discrete and Continuous Protein Structure Space: Insights into Automatic Classification and Networks of Protein Structures
Source: PubMed Central journal article supplement (PMC2654728; doi:10.1371/journal.pcbi.1000331), 2009-03-27
Supplement: pcbi.1000331.s002.pdf [file pcbi.1000331.s002.pdf]

## Supporting figure 2

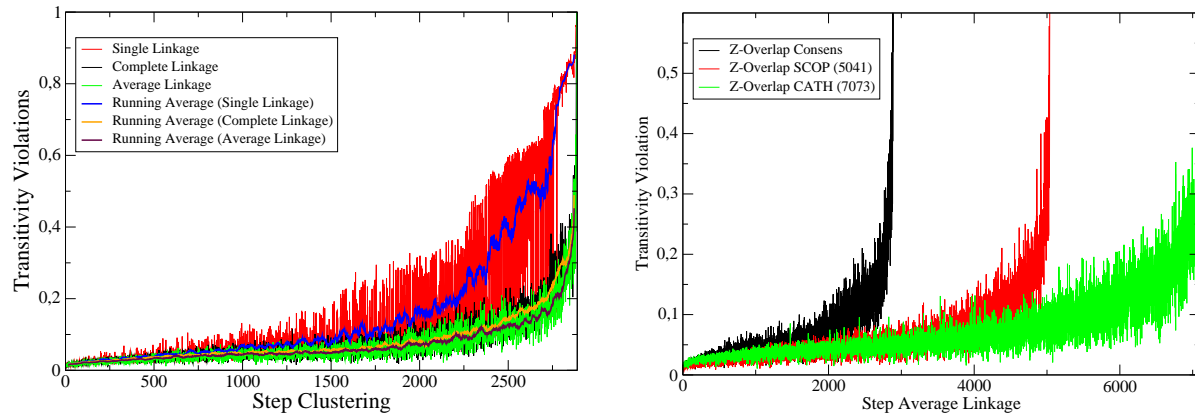

Left plot: Transitivity violations for the single linkage, average linkage and complete linkage algorithms. Right plot: Transitivity violations for three sets of domains with 2890, 5041 and 7073 domains respectively.
